# Supplementary material for: Smoking practices in relation to exhaled carbon monoxide in an occupational cohort
Source: Springer Nature journal article supplement (doi:10.1186/s12889-020-09997-4), 2020-12-01
Supplement: MOESM1 [file 18670316]

## PARTICIPANT'S QUESTIONNAIRE

1. Full name \_\_\_\_\_
2. Mobile phone \_\_\_\_\_
3. Date of birth (DD/MM/YYYY) \_\_\_\_\_
4. Sex: Male Female
5. Address \_\_\_\_\_
6. Your overall work duration: \_\_\_\_\_ full years
7. Provide details about your current position:

| Position | Work shift duration | Number of shifts per week | Work duration (years) |
|----------|---------------------|---------------------------|-----------------------|
|          |                     |                           |                       |

8. Please list your last four positions including the one you work on now:

| Position | Years |
|----------|-------|
|          |       |
|          |       |
|          |       |
|          |       |

9. Do you use respiratory personal protective equipment (respirator, gasmask, etc.)?
  - No (tick and go to question 11)
  - Yes
10. How often do you use respiratory personal protective equipment (respirator, gasmask, etc.)?
  - Seldom
  - Almost half of the work time
  - Most of the work time
  - Always
11. Have you ever smoked cigarettes?
  - No (tick and go to question 16)
  - Yes
12. Do you continue to smoke at present?
  - No (tick and go to question 16)
  - Yes
13. Do you smoke daily?
  - No (tick and go to question 16)
  - Yes
14. How many cigarettes a day do you smoke? \_\_\_\_\_
15. What is your smoking duration in years? \_\_\_\_\_
16. Do other people smoke near you at home or in the workplace?
  - No
  - Yes
- 16a. Do you smoke waterpipe at present?
  - No
  - Yes
17. Do you use fossil or biomass fuel (NOT NATURAL GAS OR PROPANE) for heating at home?
  - No
  - Yes
18. Do you use fossil or biomass fuel (NOT NATURAL GAS OR PROPANE) for cooking at home?
  - No
  - Yes
19. Do you walk 6 km or make 10 thousand steps a day, including weekends?
  - No
  - Yes
20. Are you involved in any regular physical activity at least 3 times a week?
  - No
  - Yes
21. Please choose one option of four listed below which best describes your alcohol consumption:
  - I never drink
  - I drink seldom (less than once a week) in small amounts

- I drink seldom (less than once a week) in moderate amounts
- I drink at least once a week

22. The following questions relate to your respiratory symptoms (CAT questionnaire). For each item below, place a mark (X) in a box that best describes you currently. Be sure to only select one response for each question

|   |                                                                   |             |                                                                        |
|---|-------------------------------------------------------------------|-------------|------------------------------------------------------------------------|
| A | I never cough                                                     | 0 1 2 3 4 5 | I cough all the time                                                   |
| B | I have no phlegm (mucus) in my chest at all                       | 0 1 2 3 4 5 | My chest is completely full of phlegm (mucus)                          |
| C | My chest does not feel tight at all                               | 0 1 2 3 4 5 | My chest feels very tight                                              |
| D | When I walk up a hill or one flight of stairs I am not breathless | 0 1 2 3 4 5 | When I walk up a hill or one flight of stairs I am very breathless     |
| E | I am not limited doing any activities at home                     | 0 1 2 3 4 5 | I am very limited doing activities at home                             |
| F | I am confident leaving my home despite my lung condition          | 0 1 2 3 4 5 | I am not at all confident leaving my home because of my lung condition |
| G | I sleep soundly                                                   | 0 1 2 3 4 5 | I don't sleep soundly because of my lung condition                     |
| H | I have lots of energy                                             | 0 1 2 3 4 5 | I have no energy at all                                                |

23. This question is about your breathlessness (mMRC questionnaire). Please choose only one answer that applies to you:

| Question                                                                                                                                                  | Score |
|-----------------------------------------------------------------------------------------------------------------------------------------------------------|-------|
| I only get breathless with strenuous exercise                                                                                                             | 0     |
| I get short of breath when hurrying on a level or walking up a slight hill                                                                                | 1     |
| I walk slower than people of the same age on the level because of breathlessness, or a I have to stop for breath when walking on my own pace on the level | 2     |
| I stop for breath after walking about 100 meters or after a few minutes on the level                                                                      | 3     |
| I am too breathless to leave the house or I am breathless when dressing or undressing                                                                     | 4     |

24. Have you ever had wheezing in your chest (especially when you exhale)?

- No (tick and go to question 26)
- Yes

25. Have you ever woken up at night or on early morning because of wheezing in your chest?

- No
- Yes

26. Compared to the people of your age, are you more breathless?

- No
- Yes

27. Do you have seasonal allergy (runny nose, nasal congestion in spring, summer or early fall)?

- No
- Yes

28. Has the doctor ever told you that you have chronic bronchitis?

- No
- Yes

29. Has the doctor ever told you that you have chronic obstructive pulmonary disease?

- No
- Yes

30. Has the doctor ever told you that you have bronchial asthma?

- No
- Yes

31. Has the doctor ever told you that you have allergic rhinitis

- No
- Yes

32. How many hours have elapsed since your last waterpipe smoking?

33. How many hours have elapsed since your last cigarette smoking? \_\_\_\_\_

34. How many hours have elapsed since your last presence at the scene of fire? \_\_\_\_\_
